# Supplementary material
Source: Springer Nature journal article supplement (https://www.springermedizin.de/resource/supplementary/12935_2010_252_MOESM4_ESM.pdf/9540150)

Hoechst

FITC-Annexin V

Caspases 3/7

merge

A

control

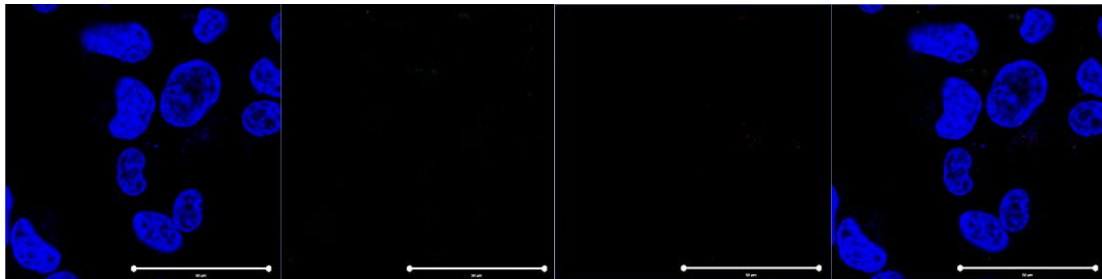

B

TICE

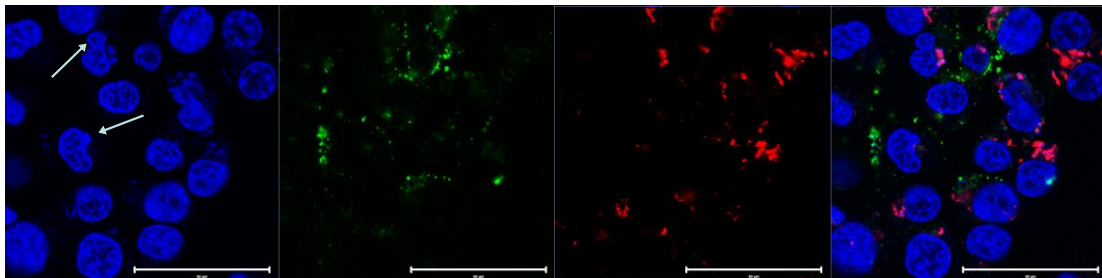

C

S4-Jena

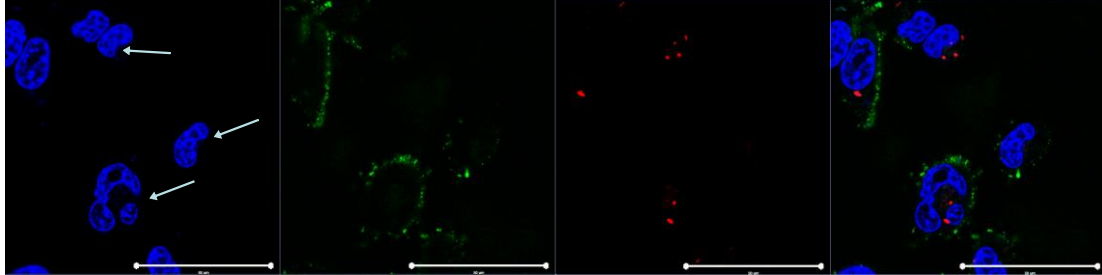

Supplement: MOESM4 [file 9540150]
